# Supplementary material
Source: publisher figshare collection journal article supplement (https://future-science-group.figshare.com/ndownloader/files/28220673)
Supplement: Supplementary file 1 [file 28220673]

**S1 Table. Search strategies.**

**Source: Pubmed**

**Searched on:** January 2, 2021

**Results:** 87

| **Search** | **Query** | **Results** |
| --- | --- | --- |
| #1 | "Extracellular Vesicles"[Mesh] | 13,024 |
| #2 | (((((((((Extracellular Vesicles[Title/Abstract]) OR (Extracellular Vesicle[Title/Abstract])) OR (Vesicle, Extracellular[Title/Abstract])) OR (Vesicles, Extracellular[Title/Abstract])) OR (Exovesicles[Title/Abstract])) OR (Exovesicle[Title/Abstract])) OR (Apoptotic Bodies[Title/Abstract])) OR (Apoptotic Body[Title/Abstract])) OR (Bodies, Apoptotic[Title/Abstract])) OR (Body, Apoptotic[Title/Abstract]) | 13,212 |
| #3 | "Exosomes"[Mesh] | 7,277 |
| #4 | Exosomes[Title/Abstract] | 13,054 |
| #5 | #1 OR #2 OR #3 OR #4 | 26,318 |
| #6 | "Mesenchymal Stem Cells"[Mesh] | 38,873 |
| #7 | ((((((((((((((((((((((((((((((((((((((((Mesenchymal Stem Cells[Title/Abstract]) OR (Stem Cell, Mesenchymal[Title/Abstract])) OR (Stem Cells, Mesenchymal[Title/Abstract])) OR (Mesenchymal Stem Cell[Title/Abstract])) OR (Bone Marrow Mesenchymal Stem Cells[Title/Abstract])) OR (Bone Marrow Mesenchymal Stem Cell[Title/Abstract])) OR (Bone Marrow Stromal Cells[Title/Abstract])) OR (Bone Marrow Stromal Cell[Title/Abstract])) OR (Bone Marrow Stromal Cells, Multipotent[Title/Abstract])) OR (Multipotent Bone Marrow Stromal Cell[Title/Abstract])) OR (Multipotent Bone Marrow Stromal Cells[Title/Abstract])) OR (Adipose-Derived Mesenchymal Stem Cells[Title/Abstract])) OR (Adipose Derived Mesenchymal Stem Cells[Title/Abstract])) OR (Adipose Tissue-Derived Mesenchymal Stem Cell[Title/Abstract])) OR (Adipose Tissue Derived Mesenchymal Stem Cell[Title/Abstract])) OR (Adipose Tissue-Derived Mesenchymal Stem Cells[Title/Abstract])) OR (Adipose Tissue Derived Mesenchymal Stem Cells[Title/Abstract])) OR (Mesenchymal Stem Cells, Adipose-Derived[Title/Abstract])) OR (Mesenchymal Stem Cells, Adipose Derived[Title/Abstract])) OR (Adipose Tissue-Derived Mesenchymal Stromal Cells[Title/Abstract])) OR (Adipose Tissue Derived Mesenchymal Stromal Cells[Title/Abstract])) OR (Adipose-Derived Mesenchymal Stromal Cells[Title/Abstract])) OR (Adipose Derived Mesenchymal Stromal Cells[Title/Abstract])) OR (Adipose-Derived Mesenchymal Stem Cell[Title/Abstract])) OR (Adipose Derived Mesenchymal Stem Cell[Title/Abstract])) OR (Mesenchymal Stromal Cells[Title/Abstract])) OR (Stromal Cell, Mesenchymal[Title/Abstract])) OR (Stromal Cells, Mesenchymal[Title/Abstract])) OR (Mesenchymal Stromal Cell[Title/Abstract])) OR (Multipotent Mesenchymal Stromal Cells[Title/Abstract])) OR (Mesenchymal Stromal Cells, Multipotent[Title/Abstract])) OR (Multipotent Mesenchymal Stromal Cell[Title/Abstract])) OR (Mesenchymal Progenitor Cell[Title/Abstract])) OR (Mesenchymal Progenitor Cells[Title/Abstract])) OR (Progenitor Cell, Mesenchymal[Title/Abstract])) OR (Progenitor Cells, Mesenchymal[Title/Abstract])) OR (Wharton Jelly Cells[Title/Abstract])) OR (Wharton's Jelly Cells[Title/Abstract])) OR (Wharton's Jelly Cell[Title/Abstract])) OR (Whartons Jelly Cells[Title/Abstract])) OR (Bone Marrow Stromal Stem Cells[Title/Abstract]) | 59,624 |
| #8 | #6 OR #7 | 65,578 |
| #9 | "Osteoarthritis"[Mesh] | 64,730 |
| #10 | ((((((((((Osteoarthritis[Title/Abstract]) OR (Osteoarthritides[Title/Abstract])) OR (Osteoarthrosis[Title/Abstract])) OR (Osteoarthroses[Title/Abstract])) OR (Arthritis, Degenerative[Title/Abstract])) OR (Arthritides, Degenerative[Title/Abstract])) OR (Degenerative Arthritides[Title/Abstract])) OR (Degenerative Arthritis[Title/Abstract])) OR (Arthrosis[Title/Abstract])) OR (Arthroses[Title/Abstract])) OR (Osteoarthrosis Deformans[Title/Abstract]) | 80,875 |
| #11 | #9 OR #10 | 99,337 |
| #12 | #5 AND #8 AND #10 | 87 |

**Source: EMBASE**

**Searched on:** January 2, 2021

**Results:** 141

| **Search** | **Query** | **Results** |
| --- | --- | --- |
| #1 | 'exosomes'/exp OR exosomes:ti,ab,kw OR 'extracellular vesicles':ti,ab,kw OR 'extracellular vesicle':ti,ab,kw OR 'vesicle, extracellular':ti,ab,kw OR 'vesicles, extracellular':ti,ab,kw OR exovesicles:ti,ab,kw OR exovesicle:ti,ab,kw OR 'apoptotic bodies':ti,ab,kw OR 'apoptotic body':ti,ab,kw OR 'bodies, apoptotic':ti,ab,kw OR 'body, apoptotic':ti,ab,kw | 38719 |
| #2 | 'osteoarthritis'/exp OR osteoarthritis:ti,ab,kw OR osteoarthritides:ti,ab,kw OR osteoosteoarthrosesarthrosis:ti,ab,kw OR 'arthritis, degenerative':ti,ab,kw OR 'arthritides, degenerative':ti,ab,kw OR 'degenerative arthritides':ti,ab,kw OR 'degenerative arthritis':ti,ab,kw OR arthrosis:ti,ab,kw OR arthroses:ti,ab,kw OR 'osteoarthrosis deformans':ti,ab,kw | 165930 |
| #3 | 'mesenchymal stem cell'/exp OR 'mesenchymal stem cells':ti,ab,kw OR 'stem cell, mesenchymal':ti,ab,kw OR 'stem cells, mesenchymal':ti,ab,kw OR 'mesenchymal stem cell':ti,ab,kw OR 'bone marrow mesenchymal stem cells':ti,ab,kw OR 'bone marrow mesenchymal stem cell':ti,ab,kw OR 'bone marrow stromal cells':ti,ab,kw OR 'bone marrow stromal cell':ti,ab,kw OR 'bone marrow stromal cells, multipotent':ti,ab,kw OR 'multipotent bone marrow stromal cell':ti,ab,kw OR 'multipotent bone marrow stromal cells':ti,ab,kw OR 'adipose-derived mesenchymal stem cells':ti,ab,kw OR 'adipose derived mesenchymal stem cells':ti,ab,kw OR 'adipose tissue-derived mesenchymal stem cell':ti,ab,kw OR 'adipose tissue derived mesenchymal stem cell':ti,ab,kw OR 'adipose tissue-derived mesenchymal stem cells':ti,ab,kw OR 'adipose tissue derived mesenchymal stem cells':ti,ab,kw OR 'mesenchymal stem cells, adipose-derived':ti,ab,kw OR 'mesenchymal stem cells, adipose derived':ti,ab,kw OR 'adipose tissue-derived mesenchymal stromal cells':ti,ab,kw OR 'adipose tissue derived mesenchymal stromal cells':ti,ab,kw OR 'adipose-derived mesenchymal stromal cells':ti,ab,kw OR 'adipose derived mesenchymal stromal cells':ti,ab,kw OR 'adipose-derived mesenchymal stem cell':ti,ab,kw OR 'adipose derived mesenchymal stem cell':ti,ab,kw OR 'mesenchymal stromal cells':ti,ab,kw OR 'stromal cell, mesenchymal':ti,ab,kw OR 'stromal cells, mesenchymal':ti,ab,kw OR 'mesenchymal stromal cell':ti,ab,kw OR 'multipotent mesenchymal stromal cells':ti,ab,kw OR 'mesenchymal stromal cells, multipotent':ti,ab,kw OR 'multipotent mesenchymal stromal cell':ti,ab,kw OR 'mesenchymal progenitor cell':ti,ab,kw OR 'mesenchymal progenitor cells':ti,ab,kw OR 'progenitor cell, mesenchymal':ti,ab,kw OR 'progenitor cells, mesenchymal':ti,ab,kw OR 'wharton jelly cells':ti,ab,kw OR 'whartons jelly cell':ti,ab,kw OR 'whartons jelly cells':ti,ab,kw OR 'bone marrow stromal stem cells':ti,ab,kw | 95705 |
| #4 | #1 AND #2 AND #3 | 141 |

**Source: Scope**

**Searched on:** January 2, 2021

**Results:** 102

| **Search** | **Query** | **Results** |
| --- | --- | --- |
| #1 | ( TITLE-ABS-KEY ( "Extracellular Vesicles" ) OR TITLE-ABS-KEY ( "Extracellular Vesicle" ) OR TITLE-ABS-KEY ( "Vesicle, Extracellular" ) OR TITLE-ABS-KEY ( "Vesicles, Extracellular" ) OR TITLE-ABS-KEY ( "Exovesicles" ) OR TITLE-ABS-KEY ( "Exovesicle" ) OR TITLE-ABS-KEY ( "Apoptotic Bodies" ) OR TITLE-ABS-KEY ( "Apoptotic Body" ) OR TITLE-ABS-KEY ( "Bodies, Apoptotic" ) OR TITLE-ABS-KEY ( "Body, Apoptotic" ) OR TITLE-ABS-KEY ( "EXOSOMES" ) ) | 25,362 |
| #2 | ( TITLE-ABS-KEY ( osteoarthritis ) OR TITLE-ABS-KEY ( osteoarthritides ) OR TITLE-ABS-KEY ( osteoarthrosis ) OR TITLE-ABS-KEY ( osteoarthroses ) OR TITLE-ABS-KEY ( osteoarthroses ) OR TITLE-ABS-KEY ( "Arthritides, Degenerative" ) OR TITLE-ABS-KEY ( "Degenerative Arthritides" ) OR TITLE-ABS-KEY ( "Degenerative Arthritis" ) OR TITLE-ABS-KEY ( arthrosis ) OR TITLE-ABS-KEY ( arthroses ) OR TITLE-ABS-KEY ( "Osteoarthrosis Deformans" ) ) | 135,763 |
| #3 | ( TITLE-ABS-KEY ( "Mesenchymal Stem Cells" ) OR TITLE-ABS-KEY ( "Stem Cell, Mesenchymal" ) OR TITLE-ABS-KEY ( "Stem Cells, Mesenchymal" ) OR TITLE-ABS-KEY ( "Mesenchymal Stem Cell" ) OR TITLE-ABS-KEY ( "Bone Marrow Mesenchymal Stem Cells" ) OR TITLE-ABS-KEY ( "Bone Marrow Mesenchymal Stem Cell" ) OR TITLE-ABS-KEY ( "Bone Marrow Stromal Cells" ) OR TITLE-ABS-KEY ( "Bone Marrow Stromal Cell" ) OR TITLE-ABS-KEY ( "Bone Marrow Stromal Cells, Multipotent" ) OR TITLE-ABS-KEY ( "Multipotent Bone Marrow Stromal Cell" ) OR TITLE-ABS-KEY ( "Multipotent Bone Marrow Stromal Cells" ) OR TITLE-ABS-KEY ( "Adipose-Derived Mesenchymal Stem Cells" ) OR TITLE-ABS-KEY ( "Adipose Derived Mesenchymal Stem Cells" ) OR TITLE-ABS-KEY ( "Adipose Tissue-Derived Mesenchymal Stem Cell" ) OR TITLE-ABS-KEY ( "Adipose Tissue Derived Mesenchymal Stem Cell" ) OR TITLE-ABS-KEY ( "Adipose Tissue-Derived Mesenchymal Stem Cells" ) OR TITLE-ABS-KEY ( "Adipose Tissue Derived Mesenchymal Stem Cells" ) OR TITLE-ABS-KEY ( "Mesenchymal Stem Cells, Adipose-Derived" ) OR TITLE-ABS-KEY ( "Mesenchymal Stem Cells, Adipose Derived" ) OR TITLE-ABS-KEY ( "Adipose Tissue-Derived Mesenchymal Stromal Cells" ) OR TITLE-ABS-KEY ( "Adipose Tissue Derived Mesenchymal Stromal Cells" ) OR TITLE-ABS-KEY ( "Adipose-Derived Mesenchymal Stromal Cells" ) OR TITLE-ABS-KEY ( "Adipose Derived Mesenchymal Stromal Cells" ) OR TITLE-ABS-KEY ( "Adipose-Derived Mesenchymal Stem Cell" ) OR TITLE-ABS-KEY ( "Adipose Derived Mesenchymal Stem Cell" ) OR TITLE-ABS-KEY ( "Mesenchymal Stromal Cells" ) OR TITLE-ABS-KEY ( "Stromal Cell, Mesenchymal" ) OR TITLE-ABS-KEY ( "Stromal Cells, Mesenchymal" ) OR TITLE-ABS-KEY ( "Mesenchymal Stromal Cell" ) OR TITLE-ABS-KEY ( "Multipotent Mesenchymal Stromal Cells" ) OR TITLE-ABS-KEY ( "Mesenchymal Stromal Cells, Multipotent" ) OR TITLE-ABS-KEY ( "Multipotent Mesenchymal Stromal Cell" ) OR TITLE-ABS-KEY ( "Mesenchymal Progenitor Cell" ) OR TITLE-ABS-KEY ( "Mesenchymal Progenitor Cells" ) OR TITLE-ABS-KEY ( "Progenitor Cell, Mesenchymal" ) OR TITLE-ABS-KEY ( "Progenitor Cells, Mesenchymal" ) OR TITLE-ABS-KEY ( "Wharton Jelly Cells" ) OR TITLE-ABS-KEY ( "Wharton's Jelly Cells" ) OR TITLE-ABS-KEY ( "Wharton's Jelly Cell" ) OR TITLE-ABS-KEY ( "Whartons Jelly Cells" ) OR TITLE-ABS-KEY ( "Bone Marrow Stromal Stem Cells" ) ) | 86,201 |
| #4 | #1 AND #2 AND #3 | 102 |

**Source: Web of science**

**Searched on:** January 2, 2021

**Results:** 122

| **Search** | **Query** | **Results** |
| --- | --- | --- |
| #1 | TOPIC: (Extracellular Vesicles) OR TOPIC: (Extracellular Vesicle) OR TOPIC: (Vesicle, Extracellular) OR TOPIC: (Vesicles, Extracellular) OR TOPIC: (Exovesicles) OR TOPIC: (Exovesicle) OR TOPIC: (Apoptotic Bodies) OR TOPIC: (Apoptotic Body) OR TOPIC: (Bodies, Apoptotic) OR TOPIC: (Body, Apoptotic) OR TOPIC: (EXOSOMES) | 40,063 |
| #2 | TOPIC: (Osteoarthritis) OR TOPIC: (Osteoarthritides) OR TOPIC: (Osteoarthrosis) OR TOPIC: (Osteoarthroses) OR TOPIC: (Arthritis, Degenerative) OR TOPIC: (Arthritides, Degenerative) OR TOPIC: (Degenerative Arthritides) OR TOPIC: (Degenerative Arthritis) OR TOPIC: (Arthrosis) OR TOPIC: (Arthroses) OR TOPIC: (Osteoarthrosis Deformans) | 99924 |
| #3 | TOPIC: (Mesenchymal Stem Cells) OR TOPIC: (Stem Cell, Mesenchymal) OR TOPIC: (Stem Cells, Mesenchymal) OR TOPIC: (Mesenchymal Stem Cell) OR TOPIC: (Bone Marrow Mesenchymal Stem Cells) OR TOPIC: (Bone Marrow Mesenchymal Stem Cell) OR TOPIC: (Bone Marrow Stromal Cells) OR TOPIC: (Bone Marrow Stromal Cell) OR TOPIC: (Bone Marrow Stromal Cells, Multipotent) OR TOPIC: (Multipotent Bone Marrow Stromal Cell) OR TOPIC: (Multipotent Bone Marrow Stromal Cells) OR TOPIC: (Adipose-Derived Mesenchymal Stem Cells) OR TOPIC: (Adipose Derived Mesenchymal Stem Cells) OR TOPIC: (Adipose Tissue-Derived Mesenchymal Stem Cell) OR TOPIC: (Adipose Tissue Derived Mesenchymal Stem Cell) OR TOPIC: (Adipose Tissue-Derived Mesenchymal Stem Cells) OR TOPIC: (Adipose Tissue Derived Mesenchymal Stem Cells) OR TOPIC: (Mesenchymal Stem Cells, Adipose-Derived) OR TOPIC: (Mesenchymal Stem Cells, Adipose Derived) OR TOPIC: (Adipose Tissue-Derived Mesenchymal Stromal Cells) OR TOPIC: (Adipose Tissue Derived Mesenchymal Stromal Cells) OR TOPIC: (Adipose-Derived Mesenchymal Stromal Cells) OR TOPIC: (Adipose Derived Mesenchymal Stromal Cells) OR TOPIC: (Adipose-Derived Mesenchymal Stem Cell) OR TOPIC: (Adipose Derived Mesenchymal Stem Cell) | 112898 |
| #4 | TOPIC: (Mesenchymal Stromal Cells) OR TOPIC: (Stromal Cell, Mesenchymal) OR TOPIC: (Stromal Cells, Mesenchymal) OR TOPIC: (Mesenchymal Stromal Cell) OR TOPIC: (Multipotent Mesenchymal Stromal Cells) OR TOPIC: (Mesenchymal Stromal Cells, Multipotent) OR TOPIC: (Multipotent Mesenchymal Stromal Cell) OR TOPIC: (Mesenchymal Progenitor Cell) OR TOPIC: (Mesenchymal Progenitor Cells) OR TOPIC: (Progenitor Cell, Mesenchymal) OR TOPIC: (Progenitor Cells, Mesenchymal) OR TOPIC: (Wharton Jelly Cells) OR TOPIC: (Wharton's Jelly Cells) OR TOPIC: (Wharton's Jelly Cell) OR TOPIC: (Whartons Jelly Cells) OR TOPIC: (Bone Marrow Stromal Stem Cells) | 54497 |
| #5 | #4 OR #3 | 120572 |
| #6 | #5 AND #2 AND #1 | 122 |
